# Supplementary material
Source: PubMed Central journal article supplement (PMC3144023)
Supplement: supp_msr015_3._Supplementary_material.pdf [file supp_msr015_3._Supplementary_material.pdf]

|                              |     |     |     |     |     |  |     |  |     |
|------------------------------|-----|-----|-----|-----|-----|--|-----|--|-----|
| <i>Geospiza difficilis</i>   | 035 |     |     |     | 1   |  |     |  | 1   |
|                              |     |     |     |     | v   |  |     |  |     |
| <i>Geospiza scandens</i>     | 009 |     | 1   | 1   |     |  |     |  | 2   |
|                              |     |     | b   | b   |     |  |     |  |     |
| <i>Geospiza scandens</i>     | 010 | 1   | 1   | 3   | 1   |  | 1   |  | 1   |
|                              |     | x   | b   | b,v | b   |  |     |  | b,x |
| <i>Geospiza scandens</i>     | 027 |     |     |     | 2   |  |     |  | 2   |
|                              |     |     |     |     | b,w |  |     |  |     |
| <i>Geospiza scandens</i>     | 036 | 2   | 7   |     |     |  |     |  | 9   |
|                              |     | a,v | a,v |     |     |  |     |  |     |
| <i>Geospiza scandens</i>     | 037 | 6   |     |     | 2   |  | 1   |  | 9   |
|                              |     | a,v |     | a   |     |  | e   |  |     |
| <i>Geospiza scandens</i>     | 038 |     | 4   |     |     |  |     |  | 4   |
|                              |     |     | a   |     |     |  |     |  |     |
| <i>Geospiza scandens</i>     | 039 |     | 1   | 1   |     |  |     |  | 2   |
|                              |     |     | a   | a   |     |  |     |  |     |
| <i>Geospiza scandens</i>     | 040 | 1   |     | 1   |     |  |     |  | 2   |
|                              |     | a   |     | a   |     |  |     |  |     |
| <i>Geospiza scandens</i>     | 041 | 1   |     |     | 1   |  |     |  | 2   |
|                              |     | a   |     |     | a   |  |     |  |     |
| <i>Geospiza scandens</i>     | 042 |     | 5   | 2   |     |  |     |  | 7   |
|                              |     |     | a   | a   |     |  |     |  |     |
| <i>Geospiza scandens</i>     | 043 | 1   | 1   | 2   | 1   |  |     |  | 5   |
|                              |     | a   | a   | a   | a   |  |     |  |     |
| <i>Geospiza scandens</i>     | 044 | 1   | 1   | 1   |     |  |     |  | 3   |
|                              |     | a   | a   | a   |     |  |     |  |     |
| <i>Geospiza conirostris</i>  | 012 |     |     |     | 1   |  | 3   |  | 4   |
|                              |     |     |     |     | b   |  | b,y |  |     |
| <i>Geospiza conirostris</i>  | 019 | 2   |     |     | 1   |  | 1   |  | 4   |
|                              |     | b   |     |     | b   |  | b   |  |     |
| <i>Geospiza conirostris</i>  | 045 |     |     |     |     |  | 1   |  | 1   |
|                              |     |     |     |     |     |  | t   |  |     |
| <i>Camarhynchus parvulus</i> | 046 | 1   |     |     |     |  |     |  | 1   |
|                              |     | v   |     |     |     |  |     |  |     |
| <i>Camarhynchus parvulus</i> | 047 | 1   |     |     | 1   |  |     |  | 2   |
|                              |     | v   |     |     | v   |  |     |  |     |
| <i>Camarhynchus parvulus</i> | 048 | 1   |     |     |     |  | 1   |  | 1   |
|                              |     | b   |     |     |     |  | d   |  | c   |
| <i>Camarhynchus parvulus</i> | 049 | 1   |     |     | 1   |  | 1   |  | 3   |
|                              |     | d   |     |     | d   |  | c   |  |     |
| <i>Camarhynchus pauper</i>   | 050 |     |     |     | 3   |  | 1   |  | 4   |

|                                 |     |     |     |       |       |       |     |    |
|---------------------------------|-----|-----|-----|-------|-------|-------|-----|----|
|                                 |     |     |     | b,v   |       | t     |     |    |
| <i>Camarhynchus pauper</i>      | 051 | 1   | 2   | 3     |       |       |     | 6  |
|                                 |     | b   | b,v | b,v   |       |       |     |    |
| <i>Camarhynchus pauper</i>      | 052 |     | 1   |       |       | 1     |     | 2  |
|                                 |     |     | e   |       |       | e     |     |    |
| <i>Camarhynchus psittacula</i>  | 053 | 1   | 1   | 1     | 1     |       |     | 4  |
|                                 |     | v   | v   | e     | e     |       |     |    |
| <i>Camarhynchus psittacula</i>  | 054 |     |     | 1     |       |       |     | 1  |
|                                 |     |     |     | b     |       |       |     |    |
| <i>Camarhynchus psittacula</i>  | 055 | 1   |     | 1     |       |       |     | 2  |
|                                 |     | b   |     | b     |       |       |     |    |
| <i>Cactospiza pallida</i>       | 004 |     | 2   | 1     |       |       |     | 3  |
|                                 |     |     | b,v | b     |       |       |     |    |
| <i>Cactospiza pallida</i>       | 056 | 1   |     | 1     |       | 1     | 1   | 4  |
|                                 |     | v   |     | v     |       | v     | e   |    |
| <i>Cactospiza pallida</i>       | 057 |     | 1   | 1     |       | 1     | 2   | 5  |
|                                 |     |     | e   | v     |       | v     | e,z |    |
| <i>Pinaroloxias inornata</i>    | 058 |     | 4   | 2     | 3     | 3     |     | 12 |
|                                 |     |     | a,v | a     | v     | z     |     |    |
| <i>Pinaroloxias inornata</i>    | 059 |     | 2   |       | 1     | 1     |     | 4  |
|                                 |     |     | a,v |       | a     | z     |     |    |
| <i>Pinaroloxias inornata</i>    | 060 |     | 1   | 1     | 1     |       |     | 3  |
|                                 |     |     | a   | a     | a     |       |     |    |
| <i>Pinaroloxias inornata</i>    | 061 |     | 1   | 1     |       |       |     | 2  |
|                                 |     |     | a   | a     |       |       |     |    |
| <i>Pinaroloxias inornata</i>    | 062 |     | 2   |       |       |       |     | 2  |
|                                 |     |     | v   |       |       |       |     |    |
| <i>Platyspiza crassirostris</i> | 013 |     | 1   |       | 4     | 3     |     | 8  |
|                                 |     |     | b   |       | b,e,v | e,t   |     |    |
| <i>Platyspiza crassirostris</i> | 014 | 3   |     |       | 1     |       | 1   | 5  |
|                                 |     | b,u |     |       | u     |       | b   |    |
| <i>Platyspiza crassirostris</i> | 063 |     |     |       | 1     |       |     | 1  |
|                                 |     |     |     |       | v     |       |     |    |
| <i>Certhidea olivacea</i>       | 006 | 2   |     | 6     | 3     |       |     | 11 |
|                                 |     | b,u |     | b,v,z | b,z   |       |     |    |
| <i>Certhidea olivacea</i>       | 064 |     |     | 2     |       | 1     |     | 3  |
|                                 |     |     |     | b,v   |       | b,t,z |     |    |
| <i>Certhidea olivacea</i>       | 065 |     |     |       | 1     |       |     | 1  |
|                                 |     |     |     |       | v     |       |     |    |
| <i>Tiaris obscura</i>           | 071 |     |     | 1     |       | 1     | 2   | 2  |
|                                 |     |     |     | a,b   |       | e     | b,e | a  |

|                                |     |       |     |         |     |     |
|--------------------------------|-----|-------|-----|---------|-----|-----|
| <i>Tiaris obscura</i>          | 072 | 1     | 2   | 1       | 2   | 6   |
|                                |     | u     | e   | b       | b,e |     |
| <i>Tiaris obscura</i>          | 073 | 3     | 2   | 2       |     | 7   |
|                                |     | a,b,u | e   | b,v     |     |     |
| <i>Tiaris obscura</i>          | 074 |       | 2   | 5       | 1   | 10  |
|                                |     |       | a,b | a,b,e,v | e   | b,u |
| <i>Tiaris obscura</i>          | 075 |       | 2   | 2       | 2   | 8   |
|                                |     |       | a,b | b,v     | b,e | u,v |
| <i>Tiaris obscura</i>          | 076 |       | 2   | 3       | 2   | 7   |
|                                |     |       | b,e | a,b,e,v | a,b |     |
| <i>Tiaris bicolor</i>          | 077 | 1 6   | 1   | 5       |     | 14  |
|                                |     | u b   | b   | b,v     |     | b   |
| <i>Tiaris bicolor</i>          | 078 | 2     | 2   |         |     | 4   |
|                                |     | v     | e   |         |     |     |
| <i>Tiaris bicolor</i>          | 080 | 4     |     |         |     | 5   |
|                                |     | e,v   |     |         |     | v   |
| <i>Tiaris bicolor</i>          | 081 |       | 2   | 1       |     | 3   |
|                                |     |       | t   | v       |     |     |
| <i>Tiaris canora</i>           | 082 |       | 2   | 2       |     | 4   |
|                                |     |       | e   | v       |     |     |
| <i>Tiaris canora</i>           | 083 |       | 3   | 1       |     | 4   |
|                                |     |       | t,z | v       |     |     |
| <i>Tiaris canora</i>           | 084 |       |     | 1       |     | 1   |
|                                |     |       |     | v       |     |     |
| <i>Tiaris canora</i>           | 085 |       |     | 1       |     | 1   |
|                                |     |       |     | v       |     |     |
| <i>Tiaris canora</i>           | 086 |       |     |         |     | 1   |
|                                |     |       |     |         |     | b   |
| <i>Melanospiza richardsoni</i> | 087 |       | 4   |         |     | 4   |
|                                |     |       | e   |         |     |     |
| <i>Melanospiza richardsoni</i> | 088 |       | 2   | 2       |     | 4   |
|                                |     |       | e   | v       |     |     |
| <i>Melanospiza richardsoni</i> | 089 |       | 2   | 2       |     | 4   |
|                                |     |       | e   | v       |     |     |
| <i>Melanospiza richardsoni</i> | 090 |       |     | 1       |     | 1   |
|                                |     |       |     | v       |     |     |
| <i>Melanospiza richardsoni</i> | 091 |       |     | 1       |     | 1   |
|                                |     |       |     | v       |     |     |
| <i>Melanospiza richardsoni</i> | 092 |       |     | 1       |     | 1   |
|                                |     |       |     | v       |     |     |
| <i>Melanospiza richardsoni</i> | 093 |       | 3   | 1       |     | 4   |

|                                |     |   |   |   |     |   |
|--------------------------------|-----|---|---|---|-----|---|
|                                |     |   | t | v |     |   |
| <i>Loxigilla noctis</i>        | 094 |   | 1 | 1 | 1   | 3 |
|                                |     |   | e | v | e   |   |
| <i>Loxigilla noctis</i>        | 095 |   | 2 |   |     | 2 |
|                                |     |   | t |   |     |   |
| <i>Coereba flaveola</i>        | 096 | 2 |   |   | 1   | 3 |
|                                |     | e |   |   | e   |   |
| <i>Volatinia jacarina</i>      | 101 |   | 2 |   | 1   | 3 |
|                                |     |   | b |   | b   |   |
| <i>Volatinia jacarina</i>      | 102 |   | 2 |   |     | 2 |
|                                |     |   | b |   |     |   |
| <i>Volatinia jacarina</i>      | 103 |   |   |   | 1   | 1 |
|                                |     |   |   |   | b   |   |
| <i>Volatinia jacarina</i>      | 104 |   | 1 |   |     | 1 |
|                                |     |   | b |   |     |   |
| <i>Volatinia jacarina</i>      | 105 |   | 4 |   |     | 4 |
|                                |     |   | b |   |     |   |
| <i>Volatinia jacarina</i>      | 106 | 1 |   |   | 1   | 2 |
|                                |     | b |   |   | b   |   |
| <i>Volatinia jacarina</i>      | 107 |   | 3 |   |     | 3 |
|                                |     |   | b |   |     |   |
| <i>Volatinia jacarina</i>      | 108 |   | 1 |   | 3   | 4 |
|                                |     |   | b |   | b   |   |
| <i>Volatinia jacarina</i>      | 109 |   | 1 |   | 1   | 2 |
|                                |     |   | b |   | b   |   |
| <i>Volatinia jacarina</i>      | 110 |   | 1 |   |     | 1 |
|                                |     |   | b |   |     |   |
| <i>Volatinia jacarina</i>      | 111 |   | 2 |   |     | 2 |
|                                |     |   | b |   |     |   |
| <i>Volatinia jacarina</i>      | 112 |   | 1 |   | 1   | 2 |
|                                |     |   | b |   | b   |   |
| <i>Volatinia jacarina</i>      | 113 |   | 1 |   |     | 1 |
|                                |     |   | b |   |     |   |
| <i>Volatinia jacarina</i>      | 114 |   | 3 |   | 1 1 | 5 |
|                                |     |   | b |   | b b |   |
| <i>Volatinia jacarina</i>      | 115 |   | 2 |   | 1   | 3 |
|                                |     |   | b |   | b   |   |
| <i>Volatinia jacarina</i>      | 116 |   | 2 |   |     | 2 |
|                                |     |   | b |   |     |   |
| <i>Poospiza hispaniolensis</i> | 117 |   | 1 |   |     | 1 |
|                                |     |   | t |   |     |   |





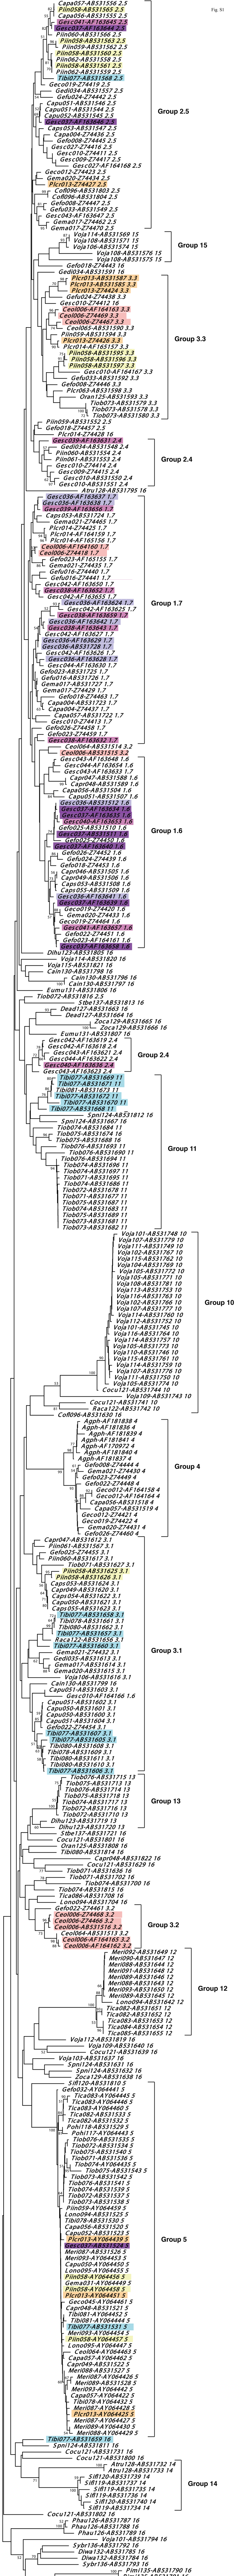



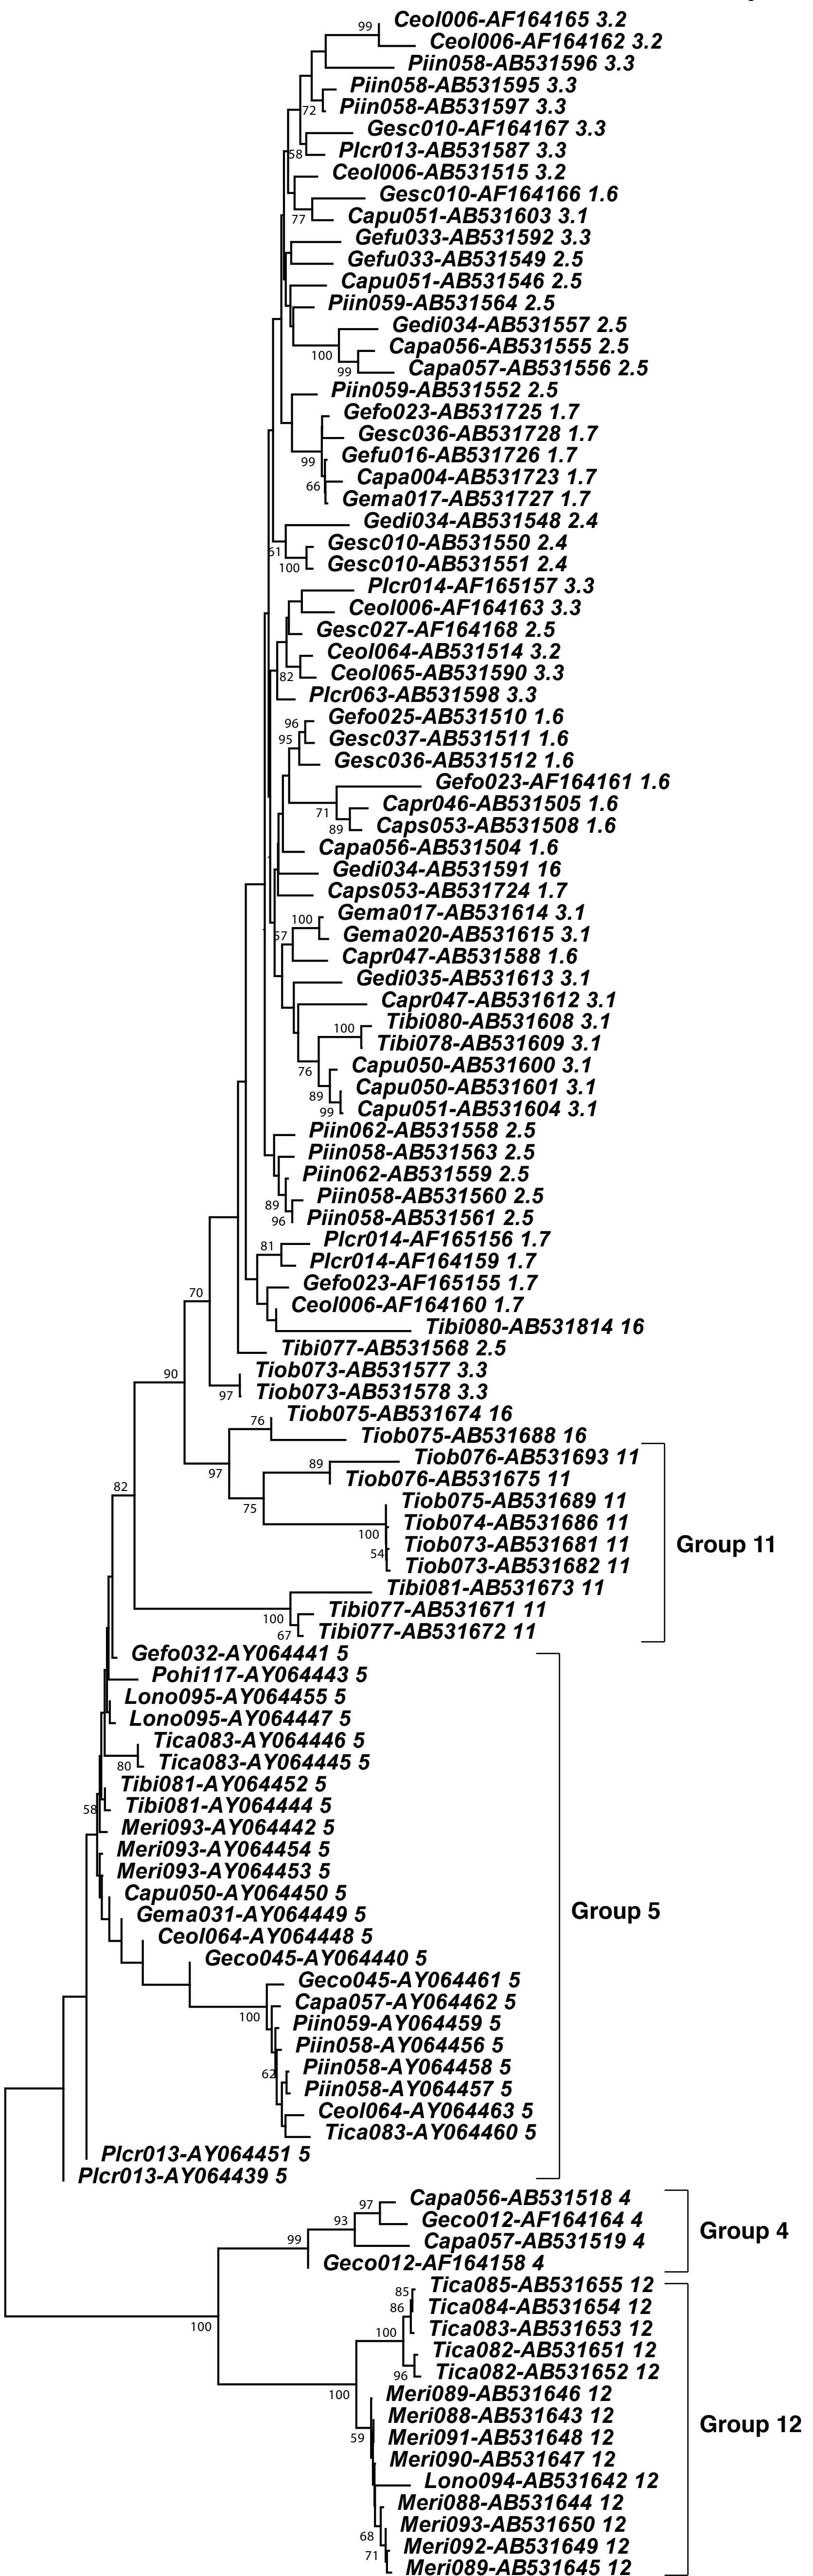



Fig. S3

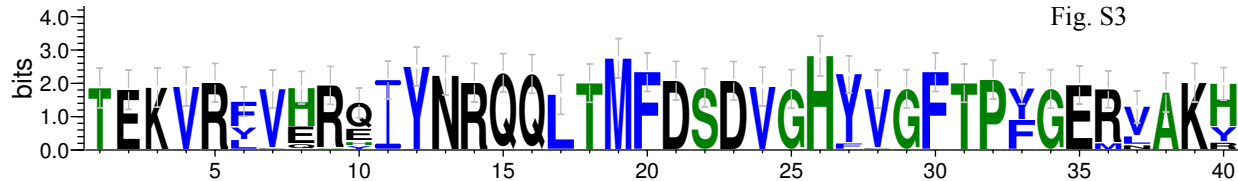

Group3-1

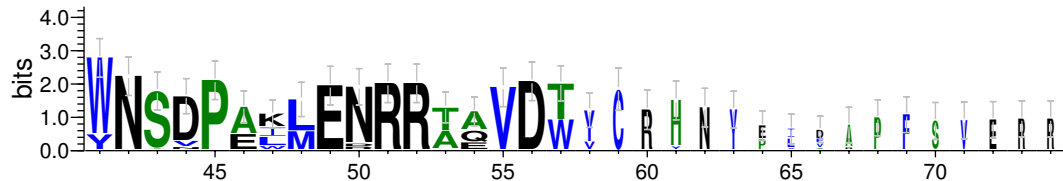

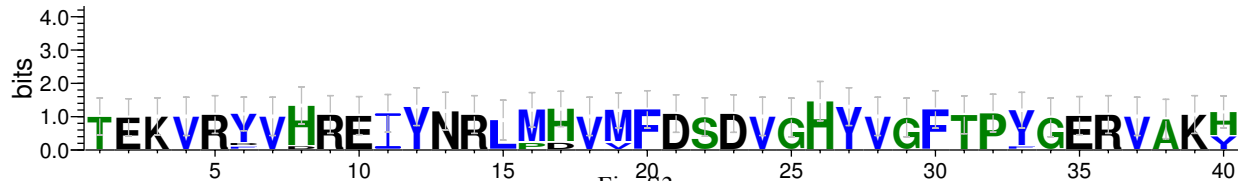

Fig. S3

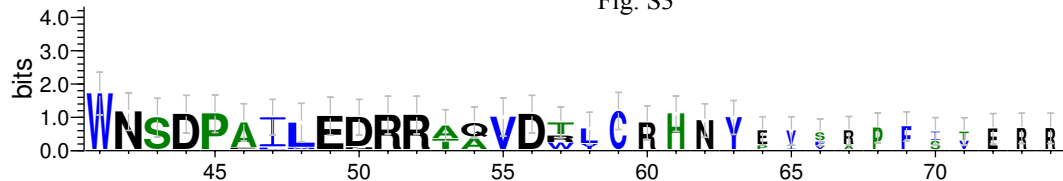

Group 3-2

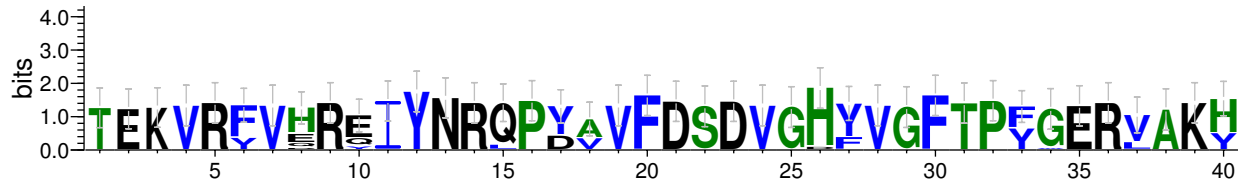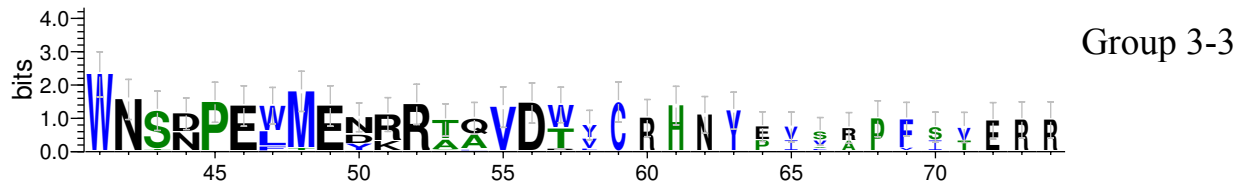

Group 3-3



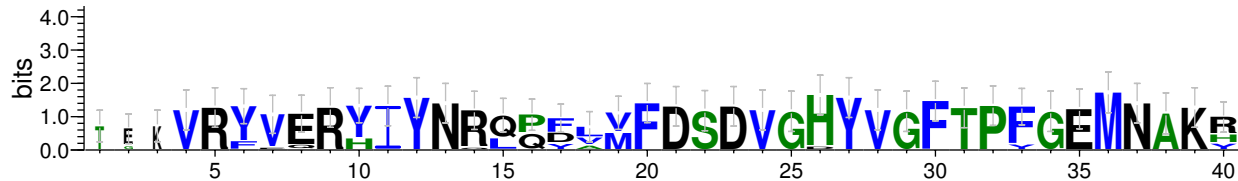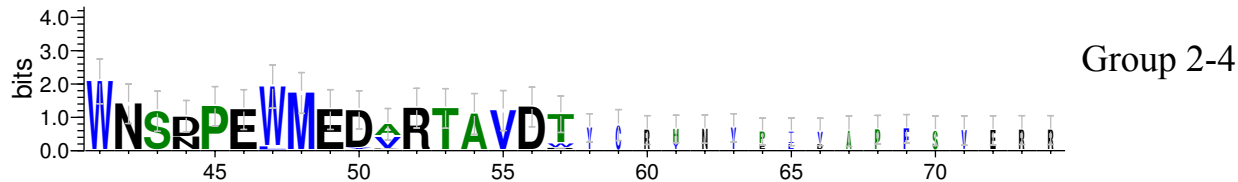

Group 2-4

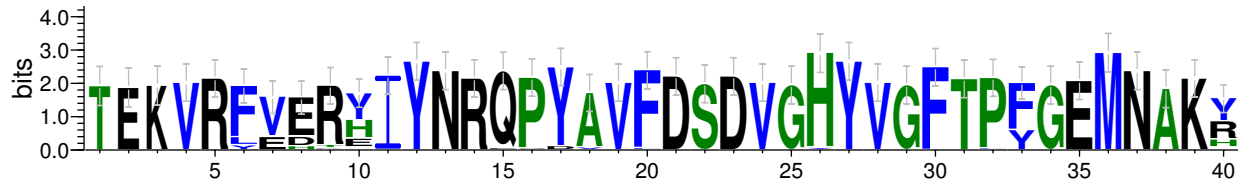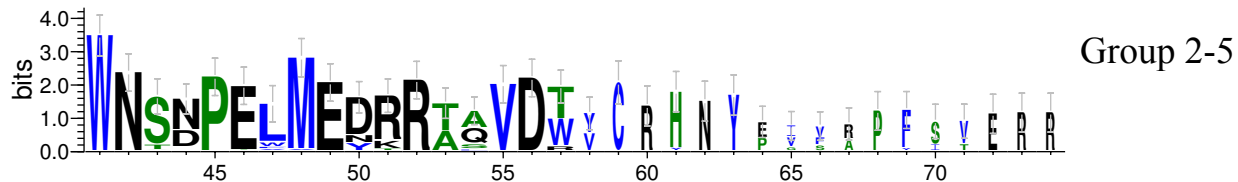

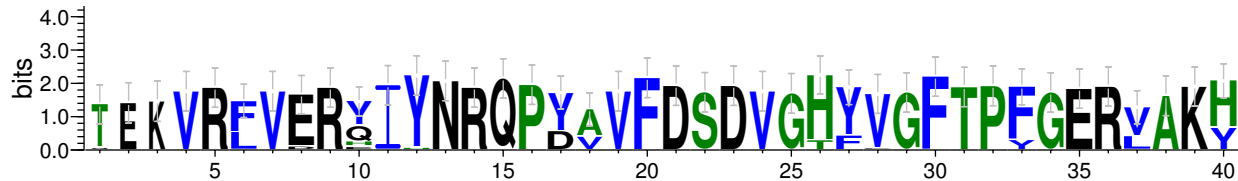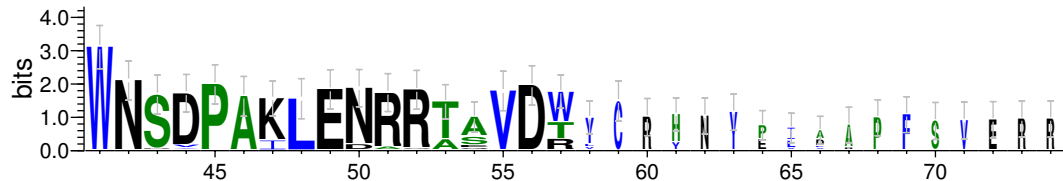

Group 1-6



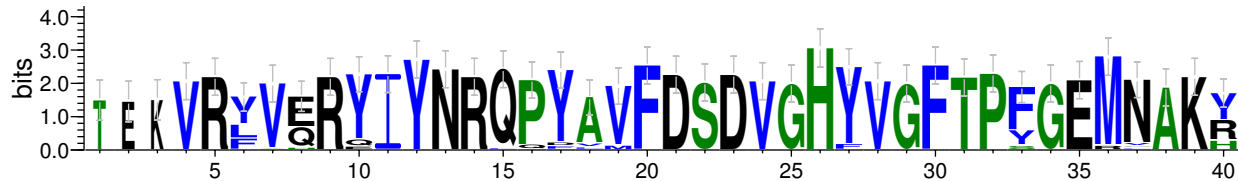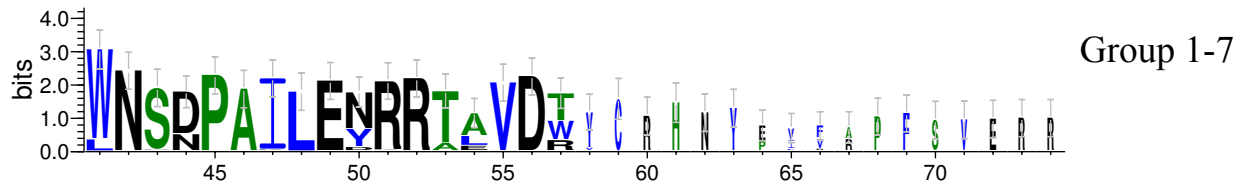

Group 1-7

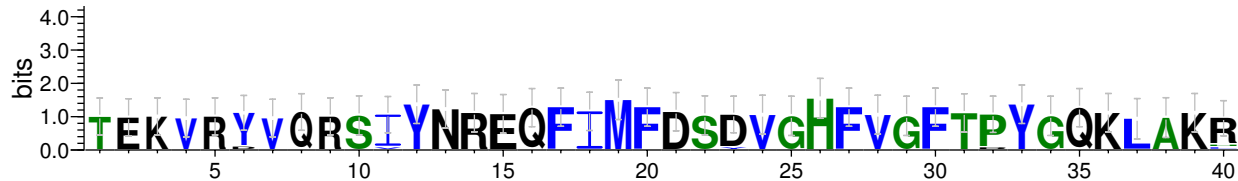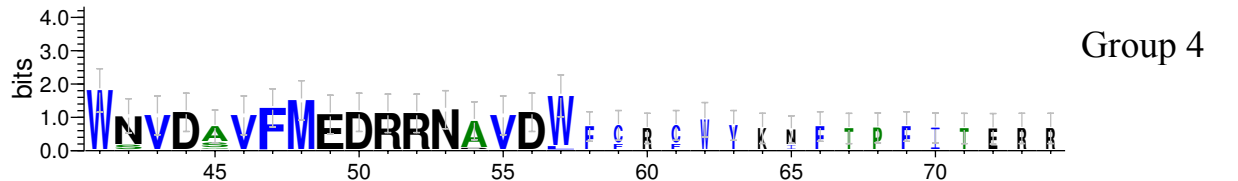

Group 4

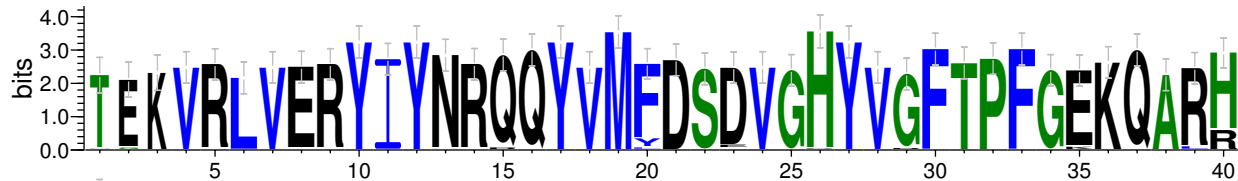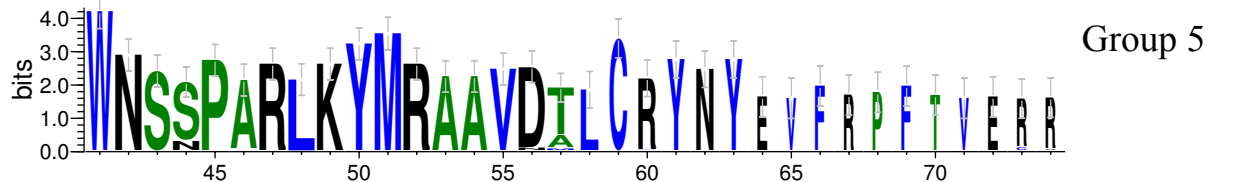



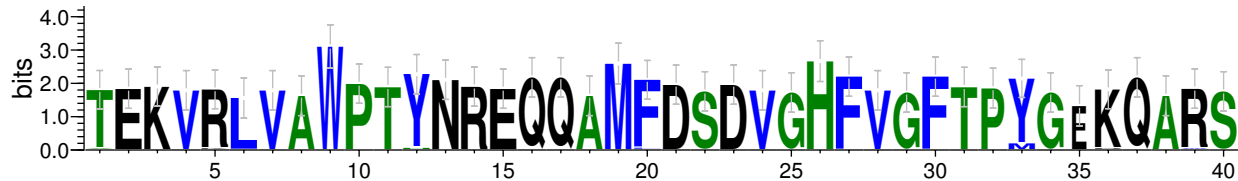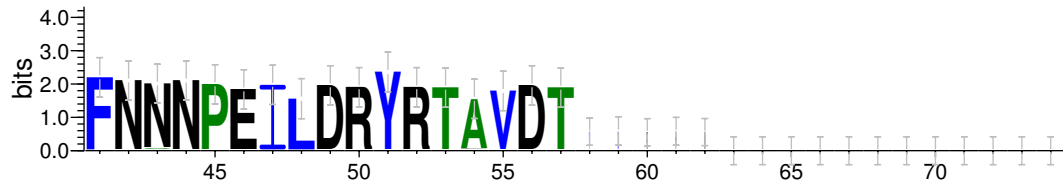

Group 10

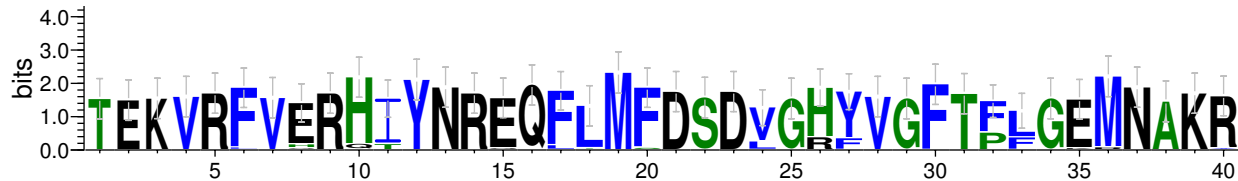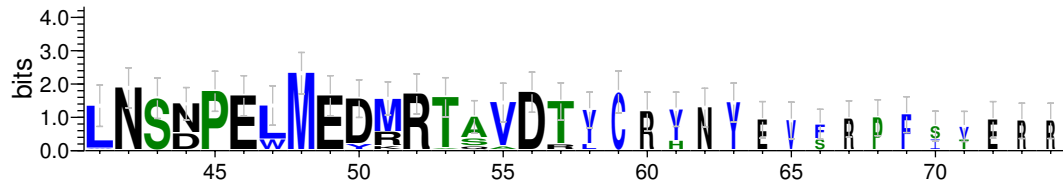

Group 11

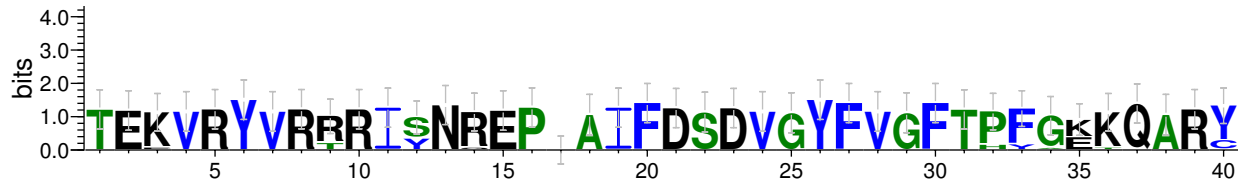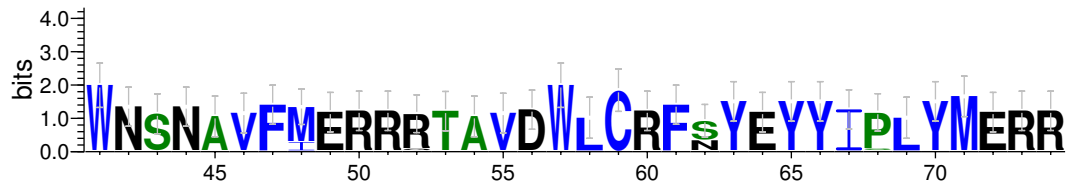

Group 12

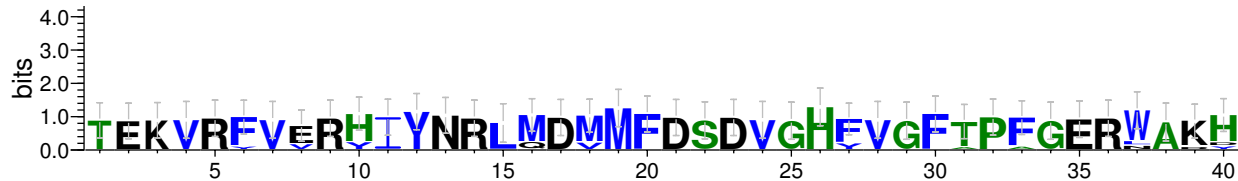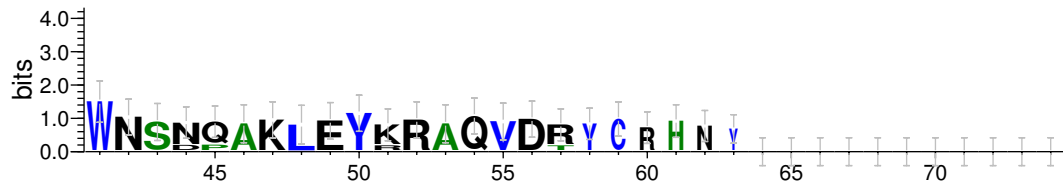

Group 13

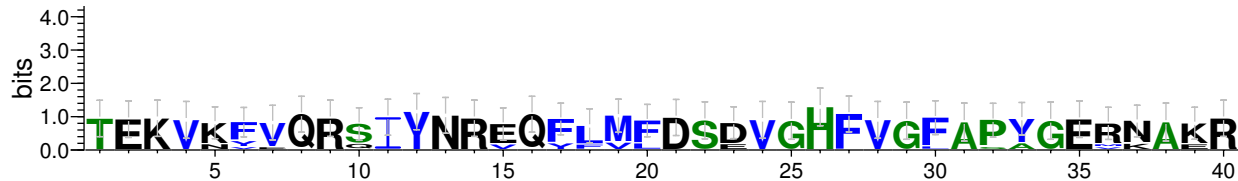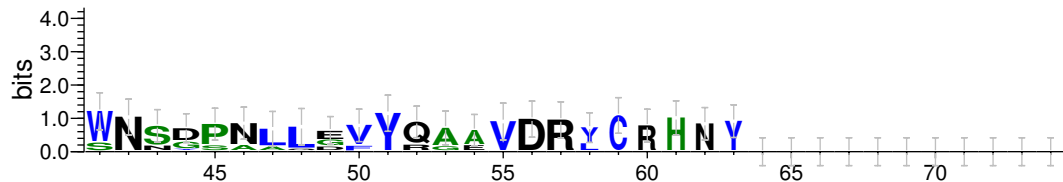

Group 14

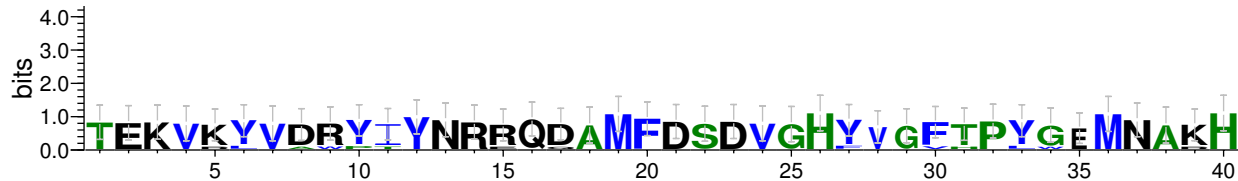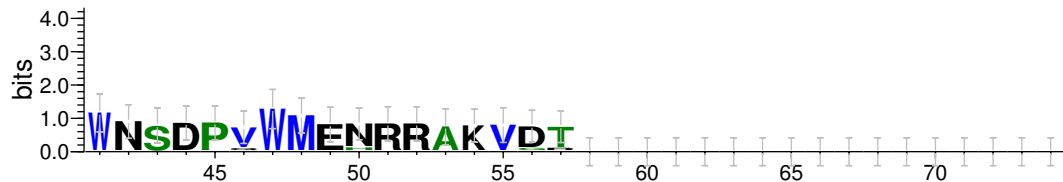

Group 15



Fig.S4

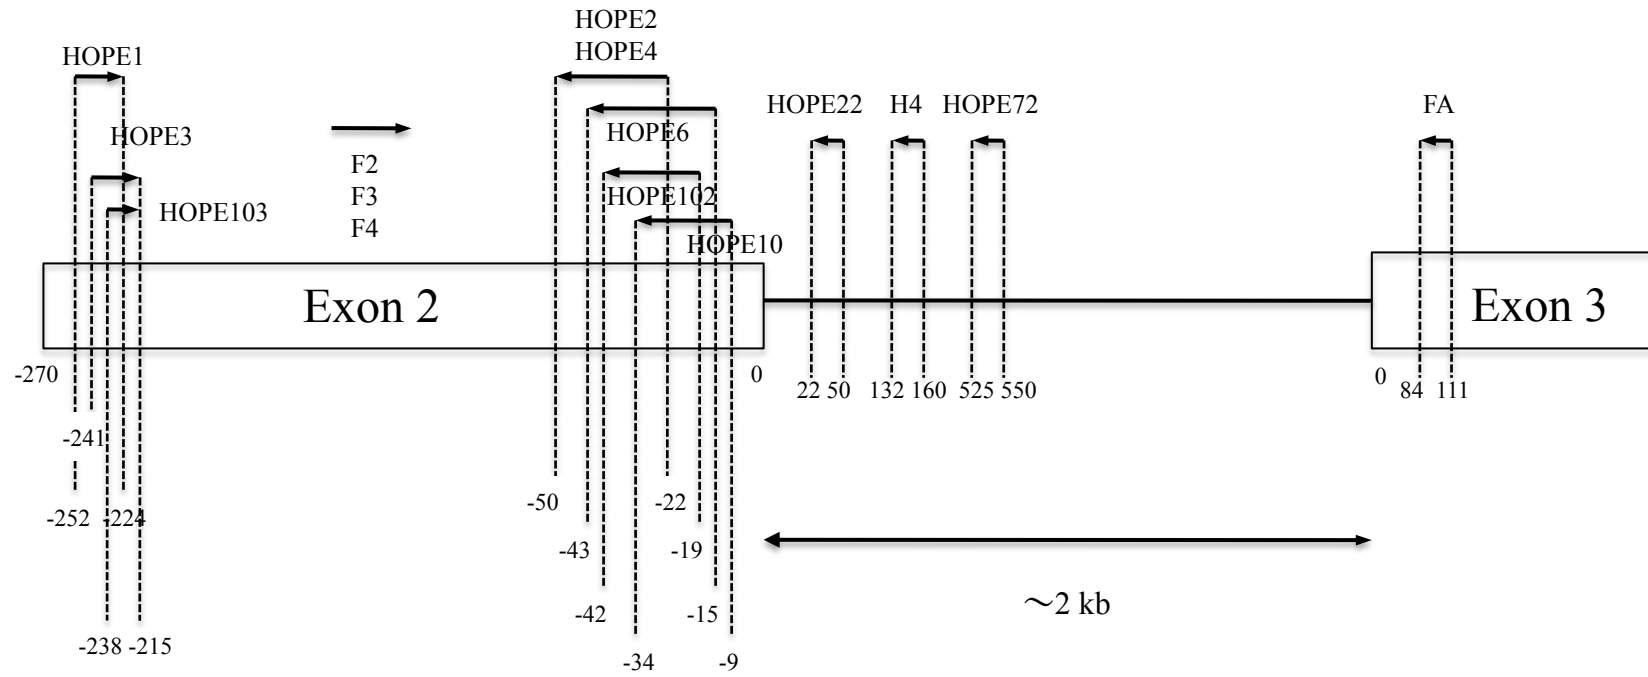

Primer sets used to amplify parts of exon 2

|   |                 |        |
|---|-----------------|--------|
| a | HOPE3-HOPE2     | 164 bp |
| b | HOPE1-HOPE2     | 173 bp |
| c | HOPE1-HOPE4     | 173 bp |
| d | HOPE1-HOPE6     | 180 bp |
| e | HOPE1-HOPE10    | 189 bp |
| f | HOPE103-HOPE102 | 172 bp |

Primer sets used to amplify parts of exon 2 and parts or whole intron 2

|   |              |              |
|---|--------------|--------------|
| t | HOPE1-HOPE22 | 292-311 bp   |
| u | HOPE 3-H4    | 371-431 bp   |
| v | HOPE1-HOPE72 | 575-761bp    |
| w | F2-FA        | 1800 bp      |
| x | F3-FA        | 1830-1916 bp |
| y | F4-FA        | 401-973 bp   |
| z | HOPE1-FA     | 387-2163 bp  |

The primer position is specified from the border between exon 2 and intron 2 in either the 5' (negative value) or 3' (positive numbers ) direction (E, exon; I, intron; S, sense; AS, antisense)

| Name    | Specificity | Position        | Sequence                            | Orientation | Annealing temperature (°C ) |
|---------|-------------|-----------------|-------------------------------------|-------------|-----------------------------|
|         | Class II    | E/I border as 0 |                                     |             |                             |
| HOPE1   | E2          | -252 to -224    | 5'-GAAAGCTCGAGTGTCACTTCACGAACGGC-3' | S           | 58                          |
| HOPE3   | E2          | -241 to -215    | 5'-TGTCACTTCACGAACGGCACGGAGAAG-3'   | S           | 58                          |
| HOPE103 | E2          | -238 to -215    | 5'-CACTTCACGAACGGCACGGAGAAG-3       | S           | 58                          |
| HOPE2   | E2          | -50 to -22      | 5'-GGGTGACAATCCGGTAGTTGTGCCGGCAG-3' | AS          | 58                          |
| HOPE4   | E2          | -50 to -22      | 5'-GGCGGAACACCTCGTAGTTGTGCCGGCAG-3' | AS          | 58                          |
| HOPE6   | E2          | -43 to -15      | 5'-CTGAACGGGCGGAACACCTCGTAGTTGTG-3' | AS          | 58                          |
| HOPE102 | E2          | -42 to -19      | 5'-ACGGGCGGAACACCTCGTAGTTGT-3'      | AS          | 58                          |
| HOPE10  | E2          | -34 to -9       | 5'-TCCACGCTGAACGGGCGGAACACCTC-3'    | AS          | 58                          |
| HOPE22  | I2          | 88 to 115       | 5'-GAATGGACTCGGAGGGTCAGGGAATATA-3'  | AS          | 58                          |
| H4      | I2          | 132 to 160      | 5'-GTTTGGATTGGGAATGGTTTGGGACGAAC-3' | AS          | 58                          |
| HOPE72  | I2          | 525 to 550      | 5'-GAGTGGGTGTAGGTTTGAGAGTGAAC-3'    | AS          | 58                          |
| FA      | E3          | 84 to 111       | 5'-ACCTCACCTGGATCGGGGCAGGGTAGAA-3'  | AS          | 58                          |
